# Supplementary material for: Technical note: Evaluation and bias correction of an observation-based global runoff dataset using streamflow observations from small tropical catchments in the Philippines
Source: Copernicus journal article supplement (doi:10.5194/hess-25-2805-2021), 2021-05-26
Supplement: Supplementary file 1 [file hess-25-2805-2021-supplement.zip]

Archive with 5 entries (5 files):
- PhilippinesRiverDischarge_Ibarra_HESS.xlsx
- hess-25-2805-2021-supplement-title-page.pdf
- TableS1.xlsx
- FigureS1.pdf
- FigureS2.pdf
