# Supplementary material for: Technical note: Evaluation and bias correction of an observation-based global runoff dataset using streamflow observations from small tropical catchments in the Philippines
Source: Copernicus journal article supplement (doi:10.5194/hess-25-2805-2021), 2021-05-26

**Figure A2.** Flow Duration Curves for individual catchments for observed (black) and GRUN predicted (grey).

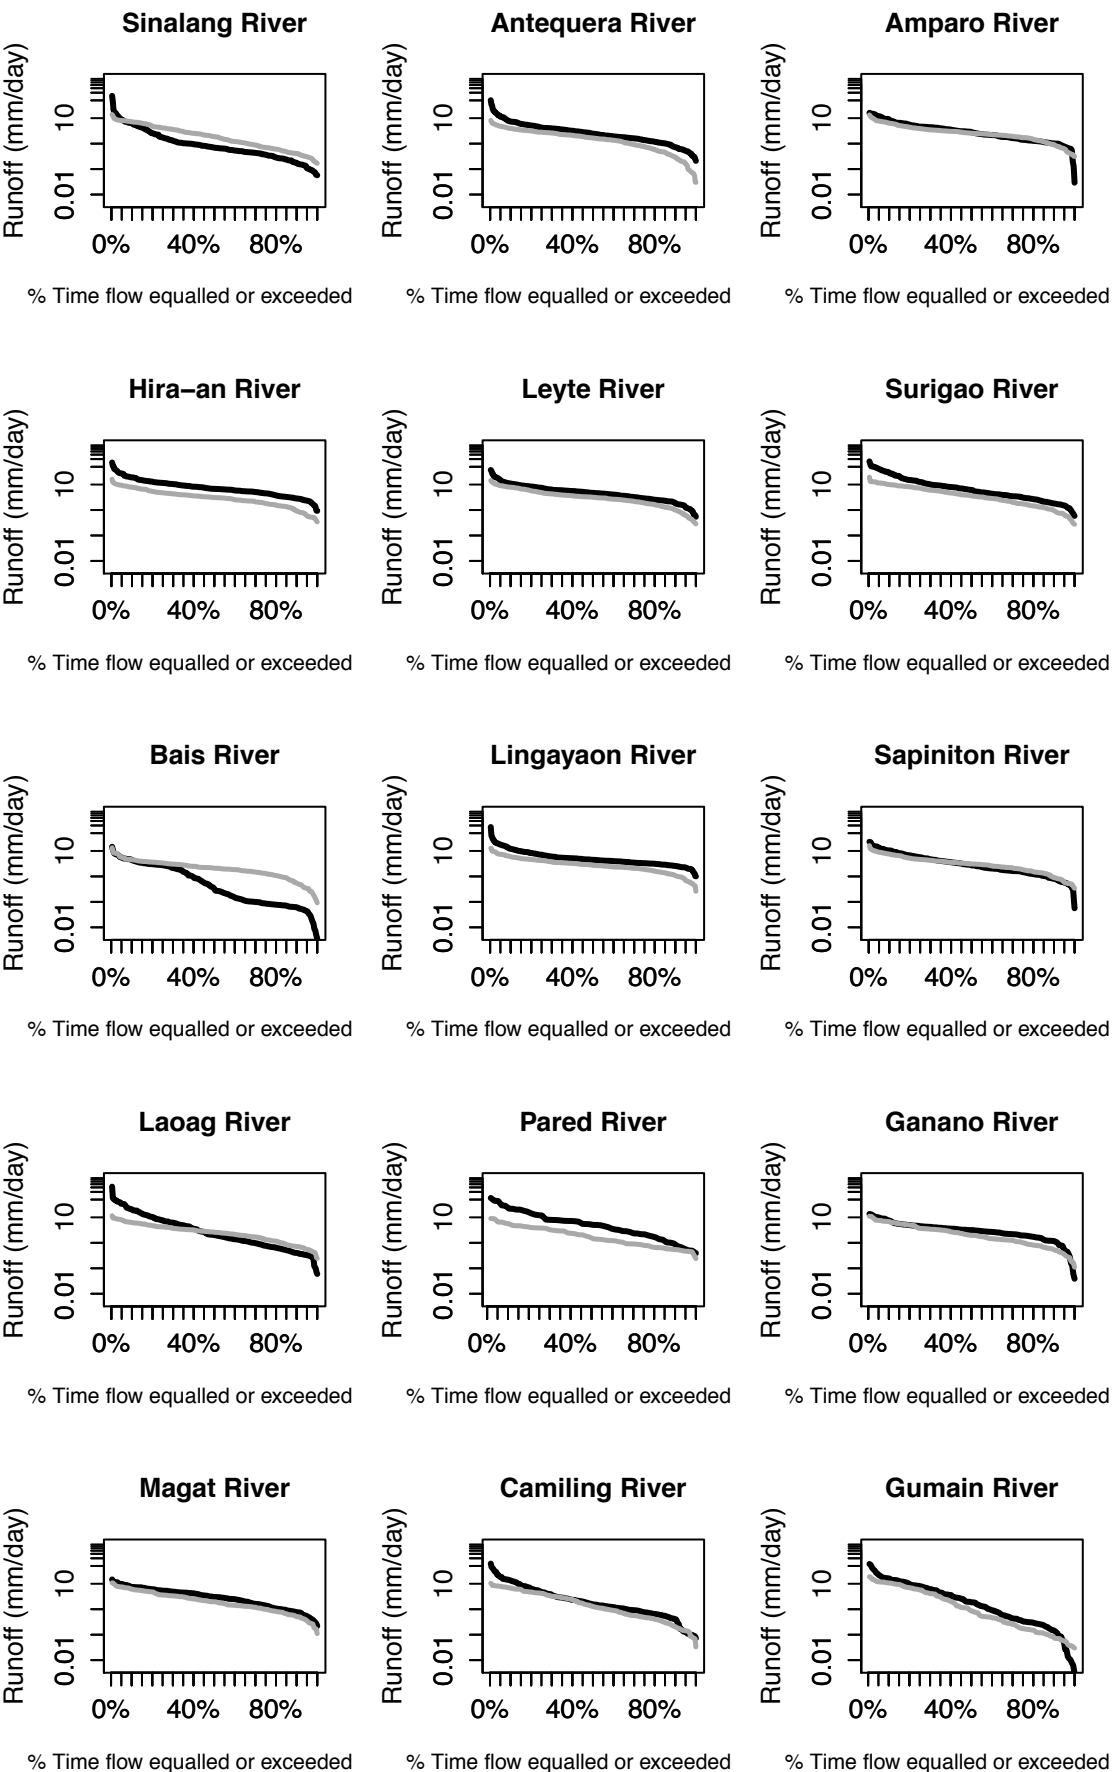

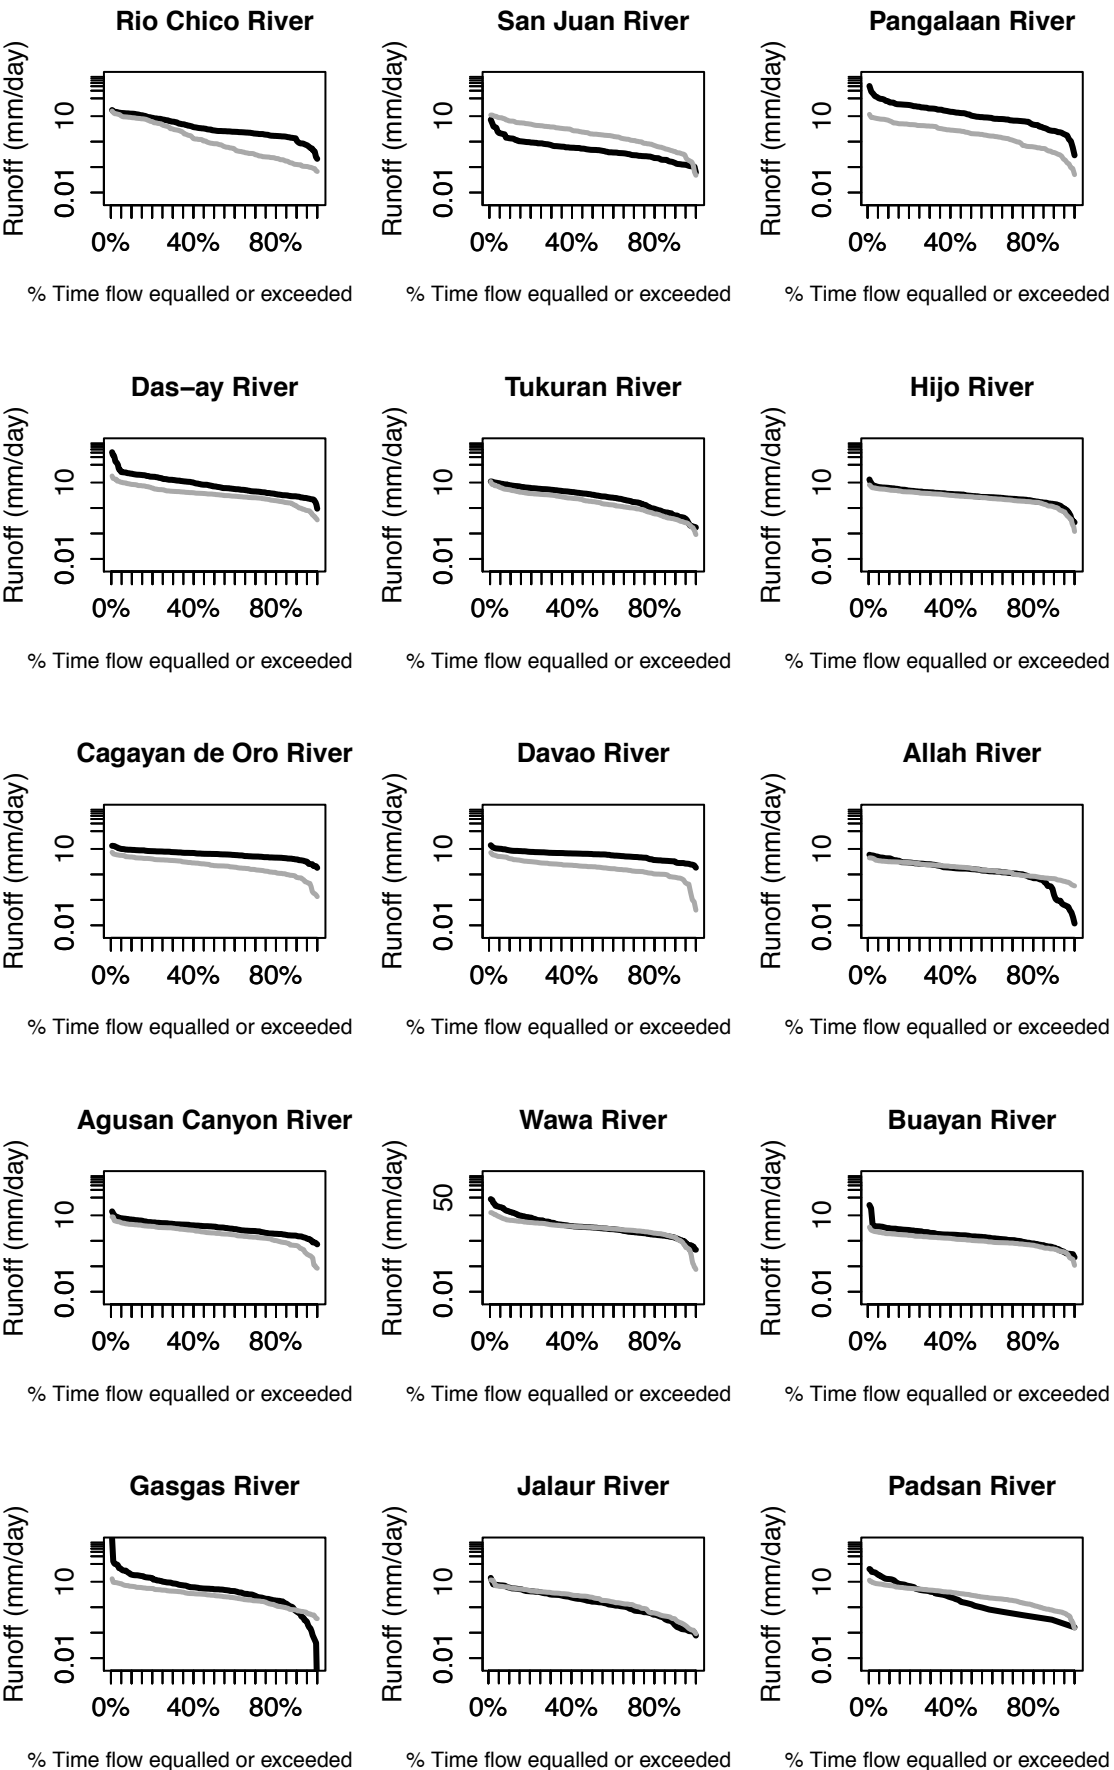

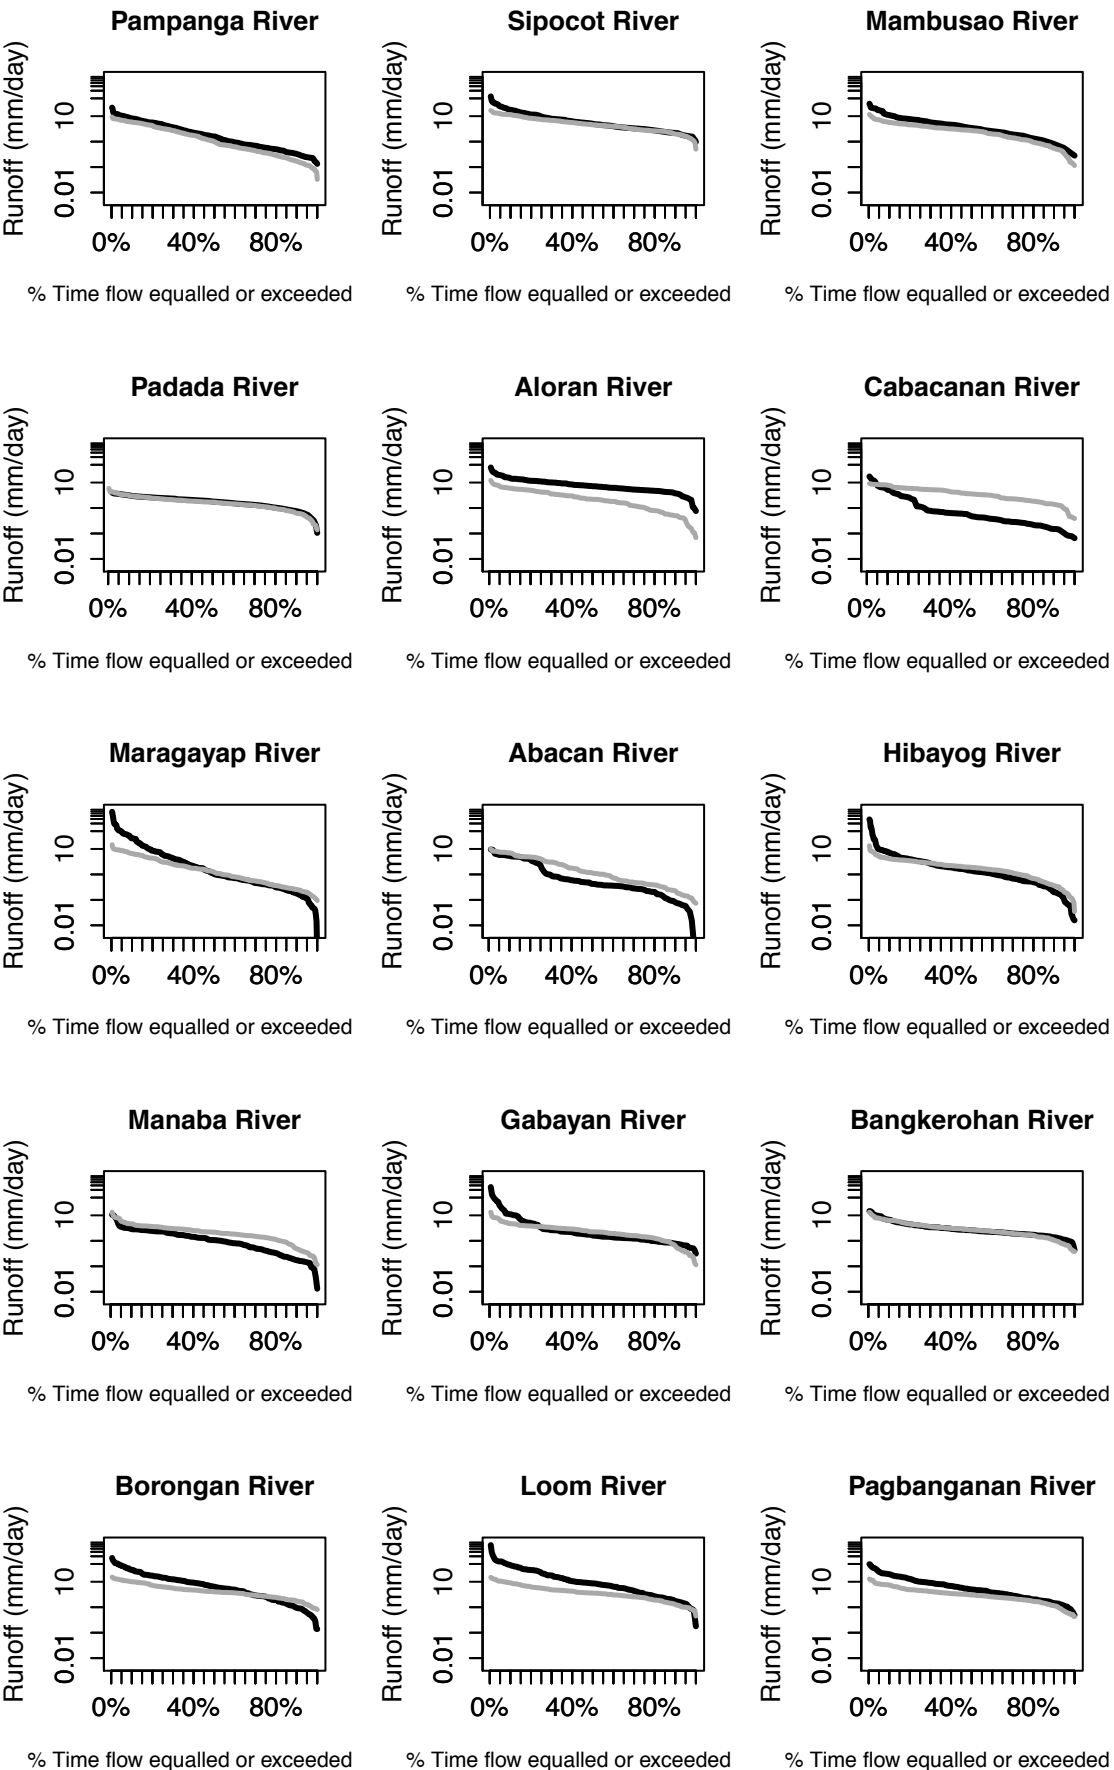

Supplement: Supplementary file 1 [file hess-25-2805-2021-supplement.zip › FigureS2.pdf]
