# Supplementary material for: Technical note: Evaluation and bias correction of an observation-based global runoff dataset using streamflow observations from small tropical catchments in the Philippines
Source: Copernicus journal article supplement (doi:10.5194/hess-25-2805-2021), 2021-05-26
Supplement: Supplementary file 1 [file hess-25-2805-2021-supplement.zip › hess-25-2805-2021-supplement-title-page.pdf]

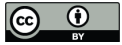

*Supplement of*

**Technical note: Evaluation and bias correction of an observation-based global runoff dataset using streamflow observations from small tropical catchments in the Philippines**

**Daniel E. Ibarra et al.**

*Correspondence to:* Daniel E. Ibarra ([daniel\\_ibarra@brown.edu](mailto:daniel_ibarra@brown.edu)) and Carlos Primo C. David ([cpdavid@nigs.upd.edu.ph](mailto:cpdavid@nigs.upd.edu.ph))

- [hess-25-2805-2021-supplement-title-page.pdf](#)
- [FigureS1.pdf](#)
- [FigureS2.pdf](#)
- [PhilippinesRiverDischarge\\_Ibarra\\_HESS.xlsx](#)
- [TableS1.xlsx](#)

The copyright of individual parts of the supplement might differ from the article licence.
