# Supplementary material for: Technical note: Evaluation and bias correction of an observation-based global runoff dataset using streamflow observations from small tropical catchments in the Philippines
Source: Copernicus journal article supplement (doi:10.5194/hess-25-2805-2021), 2021-05-26
Supplement: Supplementary file 1 [file hess-25-2805-2021-supplement.zip › TableS1.xlsx]

## Sheet: Sheet1
Table A1: Results of statistical agreement between GRUN for individual catchments
River Name	Climate Type	Pearsons Coeff (r2) *	Volumetric Efficiency (VE)	Nash-Sutcliff Efficiency (NSE)	Nash-Sutcliff Efficiency (NSE-log10)	Root Mean Square Error	Volumetric Efficiency (VE) Bias Corrected**	Nash-Sutcliff Efficiency (NSE) Bias Corrected**	Nash-Sutcliff Efficiency (NSE-log10) Bias Corrected**	Root Mean Square Error Bias Corrected**
Sinalang River	1	0.348	0.115	0.246	0.489	0.513	-0.52944	-0.158432	0.246777	2.648
Antequera River	4	0.476	0.414	0.012	-0.063	1.893	0.288185	0.162448	0.541645	0.889
Amparo River	4	0.781	0.572	0.462	0.488	0.655	0.265817	0.0332816	0.122643	1.579
Hira-an River	4	0.64	0.382	-0.224	-1.049	5.781	0.282106	0.326451	0.421394	2.798
Leyte River	3	0.666	0.487	0.062	-0.086	2.139	0.0239578	-0.0563327	0.336091	0.911
Surigao River	4	0.789	0.414	0.147	0.405	6.047	0.319438	-0.587003	-2.17201	1.596
Bais River	2	0.329	-0.322	-0.555	-0.097	0.965	0.286481	0.0200546	0.352057	2.462
Lingayaon River	4	0.697	0.477	0.089	-0.465	3.225	0.0654589	0.177868	0.323435	0.948
Sapiniton River	4	0.833	0.609	0.607	0.602	0.585	0.482165	0.388636	0.530164	2.303
Laoag River	1	0.356	0.249	0.02	0.573	4.221	-2.31609	-4.42457	-1.10369	2.036
Pared River	1	0.548	0.217	-0.186	-0.045	6.899	0.250026	0.160232	0.778949	5.32
Ganano River	3	0.736	0.53	0.228	0.212	0.834	-1.54349	-6.91722	-0.533877	1.207
Magat River	3	0.772	0.567	0.334	0.416	1.091	-1.08254	-3.93732	-0.346451	0.772
Camiling River	1	0.51	0.3	0.195	0.532	2.158	0.463099	0.0534497	0.158599	0.325
Gumain River	1	0.476	0.278	0.223	0.48	2.509	0.273199	-0.0392372	0.0511099	0.994
Rio Chico River	1	0.833	0.51	0.514	-1.472	2.072	0.532976	0.515609	0.646411	0.549
San Juan River	4	0.516	-2.079	-10.697	-2.256	2.161	0.404873	0.0680412	0.626328	4.316
Pangalaan River	3	0.591	0.155	-0.404	-2.078	14.681	0.10562	-0.551911	0.157378	12.602
Das-ay River	2	0.415	0.337	-0.114	-0.338	7.842	0.394825	-0.417776	-0.0815703	4.242
Tukuran River	3	0.647	0.443	-0.069	0.248	1.413	0.283243	-1.74614	0.038575	0.035
Hijo River	4	0.717	0.561	-0.195	-0.153	0.473	0.368768	-0.614247	0.333848	1.371
Cagayan de Oro River	4	0.859	0.404	-2.512	-9.246	3.831	0.248234	-0.16582	-1.72675	2.297
Davao River	4	0.691	0.337	-3.086	-11.525	3.872	0.343059	-0.821759	0.17967	2.724
Allah River	3	0.611	0.435	-0.137	0.163	0.057	0.200426	-1.27709	-0.00204395	0.721
Agusan Canyon River	3	0.697	0.49	-0.387	-1.555	1.466	0.401172	-0.945771	-1.77417	0.135
Wawa River	4	0.67	0.459	0.263	0.296	1.916	-0.034109	-1.61351	0.557165	0.957
Buayan River	4	0.299	0.434	-0.101	-0.192	0.829	0.379962	0.068562	0.290959	0.57
Gasgas River	1	0.123	0.223	-0.02	0.323	7.684	0.430704	-0.359426	-3.92118	5.193
Jalaur River	3	0.855	0.612	0.678	0.753	0.277	0.456319	0.126308	0.533954	2.247
Padsan River	1	0.564	0.259	0.33	0.513	0.516	0.539527	-0.0792011	-1.00806	2.162
Pampanga River	1	0.807	0.567	0.567	0.671	0.928	0.321649	-1.82817	-0.886985	0.471
Sipocot River	2	0.675	0.477	0.248	0.343	2.256	-0.477889	-3.07924	0.0991962	3.247
Mambusao River	3	0.611	0.419	0.098	0.359	1.969	0.359539	-0.41122	-1.72815	0.068
Padada River	4	0.796	0.602	-0.107	0.126	0.038	0.388718	0.107916	-0.228486	0.689
Aloran River	3	0.694	0.322	-0.835	-4.577	5.803	0.36458	-0.406413	0.273952	3.805
Cabacanan River	1	0.411	-0.782	-0.403	-0.442	2.306	0.504952	0.105916	-0.402155	5.448
Maragayap River	1	0.374	0.183	0.029	0.761	7.056	0.577055	0.649838	0.627231	5.306
Abacan River	1	0.138	-0.598	-1.481	-0.202	0.766	0.57945	0.457373	0.00537749	2.443
Hibayog River	4	0.261	0.226	0.088	0.64	1.805	0.349418	-0.0256441	0.355411	0.561
Manaba River	4	0.657	0.127	-0.295	0.247	1.009	-5.08212	-53.8418	-3.83467	2.576
Gabayan River	4	0.405	0.282	0.116	0.6	2.68	0.243518	-2.15455	-0.670523	0.963
Bangkerohan River	4	0.754	0.577	0.304	0.094	0.108	0.559925	-1.12967	-6.95935	2.237
Borongan River	2	0.72	0.358	0.073	0.564	6.381	0.403729	-2.44784	-10.5336	1.783
Loom River	2	0.472	0.234	-0.142	0.281	13.389	0.375752	0.456521	0.0764355	9.622
Pagbanganan River	4	0.794	0.393	0.072	0.352	4.545	0.41489	-0.102034	-0.325589	1.84
Rizal River	4	0.658	0.237	-0.2	0.287	8.728	0.376761	-2.47721	-0.327906	5.855
Tenani River	2	0.76	0.633	0.509	0.696	0.395	0.110159	0.2088	0.570151	4.238
Disakan River	3	0.717	0.423	0.099	0.522	2.491	-0.790486	-5.91193	-0.144662	0.811
Kabasalan River	3	0.802	0.462	-0.402	-1.396	3.181	0.252309	0.30707	0.499448	1.157
Sindangan River	3	0.711	0.514	-0.082	-0.57	1.491	0.152685	-2.36031	-0.624382	0.475
Alubijid River	3	0.71	0.234	0.032	0.386	0.787	0.563981	0.555832	0.604925	2.013
Kipaliko River	4	0.604	0.456	-0.248	-0.515	2.001	0.349206	0.161449	0.458012	0.986
Banaue River	3	0.495	0.313	-0.488	-2.162	4.974	0.298702	-0.666631	-0.746074	3.171
Aciga River	4	0.588	0.33	-0.055	-0.031	6.608	0.335236	0.184872	-0.0204336	0.81
Agusan River	4	0.739	0.584	0.357	0.239	0.72	0.267464	-0.870577	-0.225442	2.257
Notes
* For regressions forced through intercept of 0
** Two-step bias correction procedure where first mean offset is added to the predicted GRUN values and then a log-transform stretch correction is applied (see text for details)
