# Supplementary material for: Technical note: Evaluation and bias correction of an observation-based global runoff dataset using streamflow observations from small tropical catchments in the Philippines
Source: Copernicus journal article supplement (doi:10.5194/hess-25-2805-2021), 2021-05-26
Supplement: Supplementary file 1 [file PhilippinesRiverDischarge_Ibarra_HESS.xlsx]

## Sheet: SINALANG
Major River Basin	Abra River Basin
River	Sinalang River
Location	Penarrubia, Abra
Year-Month	Runoff_mm
1984-01	16.0727
1984-02
1984-03	24.9591
1984-04	20.8829
1984-05	14.392
1984-06	43.1182
1984-07	50.2659
1984-08	652.355
1984-09	156.941
1984-10	42.7704
1984-11	26.1375
1984-12	13.7159
1985-01	8.05568
1985-02	12.8466
1985-03	8.32613
1985-04	9.85227
1985-05	9.85227
1985-06	451.582
1985-07	193.104
1985-08	504.339
1985-09	199.441
1985-10	78.2579
1985-11	42.5386
1985-12
1986-01	20.1875
1986-02	11.7068
1986-03	8.03636
1986-04	6.66477
1986-05	23.4136
1986-06	31.3727
1986-07	306.077
1986-08	144.732
1986-09	552.036
1986-10	106.153
1986-11	46.7886
1986-12	30.5034
1987-01
1987-02
1987-03
1987-04
1987-05
1987-06
1987-07
1987-08
1987-09
1987-10
1987-11
1987-12
1988-01
1988-02
1988-03
1988-04
1988-05
1988-06
1988-07	227.781
1988-08	199.228
1988-09	68.85
1988-10	69.9897
1988-11	33.0148
1988-12	25.0557
1989-01
1989-02
1989-03
1989-04
1989-05
1989-06
1989-07
1989-08
1989-09
1989-10
1989-11
1989-12
1990-01
1990-02
1990-03
1990-04
1990-05
1990-06
1990-07
1990-08
1990-09
1990-10
1990-11
1990-12
1991-01	7.92045
1991-02	6.62613
1991-03	5.54431
1991-04	6.7034
1991-05	7.82386
1991-06	12.8852
1991-07	22.4284
1991-08	124.023
1991-09	259.926
1991-10	197.49
1991-11	171.7
1991-12	40.5488
1992-01	20.6125
1992-02	15.4352
1992-03	13.0204
1992-04	12.4023
1992-05	14.3148
1992-06	24.8045
1992-07	16.7295
1992-08	133.585
1992-09	1383.59
1992-10	76.1136
1992-11	32.4159
1992-12	24.8432
1993-01	22.4477
1993-02	21.8295
1993-03	23.0079
1993-04	25.2295
1993-05	28.05
1993-06	69.4488
1993-07	52.7579
1993-08	136.676
1993-09	164.765
1993-10	72.6363
1993-11	24.2443
1993-12	13.9284
1994-01	10.2
1994-02	7.88181
1994-03	7.26363
1994-04	7.70795
1994-05	8.44204
1994-06	14.0443
1994-07	250.093
1994-08	218.72
1994-09	127.964
1994-10	30.3682
1994-11	20.9795
1994-12	13.9477
1995-01	10.3352
1995-02	5.93068
1995-03	4.53977
1995-04	4.61704
1995-05	5.27386
1995-06	4.77159
1995-07	14.2182
1995-08	79.7068
1995-09	119.058
1995-10	27.142
1995-11	13.3875
1995-12	3.92159
1996-01	2.99432
1996-02	1.87386
1996-03	1.73864
1996-04	1.75795
1996-05	2.22159
1996-06	4.26932
1996-07	492.227
1996-08	359.26
1996-09	40.1432
1996-10	12.5954
1996-11	13.6966
1996-12	2.39545
1997-01	11.5136
1997-02	8.01704
1997-03	4.75227
1997-04	3.16818
1997-05	7.26363
1997-06	8.78977
1997-07	11.0114
1997-08	204.328
1997-09	97.7499
1997-10	23.5682
1997-11	9.75568
1997-12	6.64545
1998-01
1998-02
1998-03
1998-04
1998-05
1998-06
1998-07
1998-08
1998-09
1998-10
1998-11
1998-12
1999-01
1999-02
1999-03
1999-04
1999-05
1999-06
1999-07
1999-08
1999-09
1999-10
1999-11
1999-12
2000-01	147.436
2000-02	37.5932
2000-03	9.07954
2000-04	6.93522
2000-05	13.4454
2000-06	17.5602
2000-07	364.437
2000-08	235.469
2000-09	217.523
2000-10	189.202
2000-11	48.1216
2000-12	31.1216
2001-01	19.975
2001-02	13.1557
2001-03	8.30681
2001-04	5.77613
2001-05	8.6159
2001-06	8.86704
2001-07	156.033
2001-08	55.3659
2001-09	199.962
2001-10	43.0409
2001-11	17.1545
2001-12	6.78068
2002-01	4.21136
2002-02	2.91704
2002-03	2.55
2002-04	2.3375
2002-05	4.52045
2002-06	3.28409
2002-07	134.609
2002-08	86.1784
2002-09	17.0773
2002-10	23.2204
2002-11	7.18636
2002-12	4.34659
2003-01	4.59772
2003-02	5.83409
2003-03	5.46704
2003-04	5.38977
2003-05	12.5568
2003-06	116.604
2003-07	31.392
2003-08	48.7011
2003-09	68.5795
2003-10	20.4386
2003-11	15.3773
2003-12	7.41818
2004-01	4.17272
2004-02	2.7625
2004-03	3.24545
2004-04	2.72386
2004-05	3.01363
2004-06	260.563
2004-07
2004-08
2004-09
2004-10
2004-11
2004-12
2005-01	21.8295
2005-02	20.5545
2005-03	17.4443
2005-04	14.1989
2005-05	13.2329
2005-06	35.7
2005-07	30.1363
2005-08	164.514
2005-09	188.178
2005-10	107.622
2005-11	38.3852
2005-12	25.0943
2006-01	17.0773
2006-02	13.3682
2006-03	11.5909
2006-04	10.4125
2006-05	10.6057
2006-06	12.4795
2006-07	321.454
2006-08	209.873
2006-09	78.2772
2006-10	28.1659
2006-11	31.3148
2006-12	15.9954
2007-01	6.66477
2007-02	15.5704
2007-03	13.9477
2007-04	13.6193
2007-05	28.0886
2007-06	27.8568
2007-07	30.5807
2007-08	284.788
2007-09	90.5056
2007-10	145.736
2007-11	37.0329
2007-12	16.0534
2008-01	8.09431
2008-02	5.50568
2008-03	4.82954
2008-04
2008-05	4.69432
2008-06	2.74318
2008-07	215.32
2008-08	2297.3
2008-09	104.724
2008-10	51.8306
2008-11	33.4204
2008-12	18.5454
2009-01	13.7159
2009-02	21.3659
2009-03	29.4602
2009-04	57.0852
2009-05	49.8216
2009-06	92.109
2009-07	54.9409
2009-08	57.1238
2009-09	54.6318
2009-10	382.5
2009-11	33.6136
2009-12	30.5613
2010-01	31.6818
2010-02	31.1216
2010-03	29.8079
2010-04	30.9091
2010-05	32.7829
2010-06	39.6988
2010-07	36.975
2010-08	32.9375
2010-09	34.5602
2010-10	27.0648
2010-11	29.9432
2010-12	29.6341
2011-01	27.2
2011-02	15.5125
2011-03	16.942
2011-04	15.1841
2011-05	15.0295
2011-06	45.1272
2011-07	19.8977
2011-08	69.0045
2011-09	76.809
2011-10	48.0829
2011-11	28.3977
2011-12	19.2409
2012-01	15.4739
2012-02	19.5886
2012-03	19.6659
2012-04	18.5454
2012-05	19.125
2012-06	20.7091
2012-07	26.6011
2012-08	165.479
2012-09	69.9511
2012-10	28.5716
2012-11	19.8591
2012-12	21.6943
2013-01	19.5886
2013-02	17.0193
2013-03	16.15
2013-04	16.2079
2013-05	17.9079
2013-06	19.3375
2013-07	24.6113
2013-08	280.423
2013-09	109.225
2013-10	33.3045
2013-11	19.3954
2013-12	11.1273
2014-01	11.4557
2014-02	11.1079
2014-03	10.1227
2014-04	11.6295
2014-05	12.7886
2014-06	10.1807
2014-07	15.4545
2014-08	16.4204
2014-09	128.736
2014-10	22.8341
2014-11	14.5852
2014-12	10.2193
2015-01	8.69318
2015-02	8.77045
2015-03	9.19545
2015-04	9.58181
2015-05	9.87158
2015-06	10.625
2015-07	83.4931
2015-08	684.192
2015-09
2015-10
2015-11
2015-12

## Sheet: ANTEQUERA
Major River Basin	Abatan River Basin
River	Antequera River
Location	Sto. Rosario, Antequera, Bohol
Year-Month	Runoff_mm
1984-01
1984-02
1984-03	33.26
1984-04	144.58
1984-05	99.45
1984-06	210.14
1984-07	119.39
1984-08	37.55
1984-09	382.13
1984-10	157.23
1984-11	92.06
1984-12	221.66
1985-01	342.09
1985-02	73.56
1985-03	51.63
1985-04	71.9
1985-05	147.36
1985-06	167.62
1985-07	95.18
1985-08	50.39
1985-09	64.22
1985-10	288.82
1985-11	191.09
1985-12	158.62
1986-01	216.21
1986-02	83.24
1986-03	48.86
1986-04	60.48
1986-05	41.81
1986-06	70.56
1986-07	114.43
1986-08	110.26
1986-09	66.77
1986-10	154.26
1986-11	154.13
1986-12	97.02
1987-01	57.78
1987-02	31.49
1987-03	23.01
1987-04	20.5
1987-05	18.3
1987-06	15.31
1987-07	51.09
1987-08	56.25
1987-09	31.68
1987-10	37.99
1987-11	107.18
1987-12	33.33
1988-01
1988-02
1988-03
1988-04
1988-05
1988-06
1988-07
1988-08
1988-09
1988-10
1988-11
1988-12
1989-01
1989-02
1989-03
1989-04
1989-05
1989-06
1989-07
1989-08
1989-09
1989-10
1989-11
1989-12
1990-01
1990-02
1990-03
1990-04
1990-05
1990-06
1990-07
1990-08
1990-09
1990-10
1990-11
1990-12
1991-01
1991-02
1991-03
1991-04
1991-05
1991-06
1991-07
1991-08
1991-09
1991-10
1991-11
1991-12
1992-01	16.36
1992-02	12.44
1992-03	10.24
1992-04	7.52
1992-05
1992-06	18.52
1992-07	12.32
1992-08	22.24
1992-09	9.52
1992-10	43.8
1992-11	31.2
1992-12	9.04
1993-01	15.52
1993-02	61.6
1993-03	37.35
1993-04	9.94
1993-05	9.47
1993-06	32.21
1993-07	21.33
1993-08	39.38
1993-09	52.51
1993-10	55.6
1993-11	54.1
1993-12	238.58
1994-01	63.98
1994-02	24.95
1994-03	18.65
1994-04	59.28
1994-05	108.52
1994-06	217.06
1994-07	111.9
1994-08	27.97
1994-09	18.58
1994-10	86.25
1994-11	62.5
1994-12	45.19
1995-01	22.77
1995-02	21.86
1995-03	21.33
1995-04	29.52
1995-05	41.71
1995-06	103.78
1995-07	118.54
1995-08	150.14
1995-09
1995-10
1995-11
1995-12
1996-01
1996-02
1996-03	155.69
1996-04	113.9
1996-05	93.89
1996-06	171.26
1996-07	283.17
1996-08	170.13
1996-09	195.41
1996-10	459.3
1996-11	481.87
1996-12	54.51
1997-01	46.87
1997-02	186.05
1997-03	57.59
1997-04	38.02
1997-05	25.79
1997-06	82.32
1997-07	391.74
1997-08	33.58
1997-09	86.02
1997-10	219.58
1997-11	62.69
1997-12	52.87
1998-01	20.48
1998-02	12.96
1998-03	13.8
1998-04	13.6
1998-05	6.37
1998-06	88.68
1998-07	119.36
1998-08	342.16
1998-09	86.88
1998-10	561.72
1998-11	129.24
1998-12	40.88
1999-01	35.52
1999-02	82.8
1999-03	57.08
1999-04	498.32
1999-05	563.92
1999-06	1039.84
1999-07	959.84
1999-08	605.28
1999-09	391.72
1999-10	699.6
1999-11	1539.36
1999-12	176.44
2000-01	44.69
2000-02	98.37
2000-03	99.94
2000-04	114.91
2000-05	66.46
2000-06	197.71
2000-07	54.31
2000-08	71.67
2000-09	48
2000-10	92.7
2000-11	183.41
2000-12	222.6
2001-01	66.36
2001-02	25.85
2001-03	55.25
2001-04	45.7
2001-05	60.66
2001-06	97.39
2001-07	41.76
2001-08	35.22
2001-09	30.29
2001-10	54.71
2001-11	343.34
2001-12	145.43
2002-01	49.5
2002-02	30.33
2002-03	73.21
2002-04	28.75
2002-05	92.01
2002-06	46.9
2002-07	54.51
2002-08	28.12
2002-09	32.98
2002-10	99.2
2002-11	58.9
2002-12	37.65
2003-01	72.66
2003-02	55.91
2003-03	36.41
2003-04	18.29
2003-05	69.29
2003-06	122.83
2003-07	142.35
2003-08	110.61
2003-09	47.57
2003-10	152.32
2003-11	123.65
2003-12	238.08
2004-01	81.94
2004-02	49.64
2004-03	56.94
2004-04	28.85
2004-05	106.44
2004-06	51.84
2004-07	125.34
2004-08	47.96
2004-09	81.07
2004-10	43.75
2004-11	35.04
2004-12	58.43
2005-01	18.7
2005-02	15.23
2005-03	16.02
2005-04	14.93
2005-05	23.46
2005-06	31.87
2005-07	39.63
2005-08	49.6
2005-09	35.28
2005-10	67.95
2005-11	49.1
2005-12	109.02
2006-01	38.49
2006-02	123.65
2006-03	69.64
2006-04	54.34
2006-05	116.41
2006-06	215.47
2006-07	62.94
2006-08	60.36
2006-09	53.66
2006-10	50.69
2006-11	49.44
2006-12	39.93
2007-01	96.12
2007-02	17.38
2007-03	17.76
2007-04	17.28
2007-05	41.61
2007-06	260.54
2007-07	324.83
2007-08	74.9
2007-09	44.4
2007-10	63.14
2007-11	237.02
2007-12	73.01
2008-01	327.36
2008-02	216.97
2008-03	379.84
2008-04	131.71
2008-05	207.63
2008-06	176.59
2008-07	182.92
2008-08	101.73
2008-09	90.14
2008-10	125.98
2008-11	80.45
2008-12	97.46
2009-01	130.1
2009-02	168.36
2009-03	60.02
2009-04	53.42
2009-05	64.93
2009-06	85.01
2009-07	174.94
2009-08	56.05
2009-09	33.07
2009-10	66.41
2009-11	76.27
2009-12	38.59
2010-01	75.19
2010-02	29.88
2010-03	32.39
2010-04	31.39
2010-05	36.65
2010-06	41.04
2010-07	136.2
2010-08	115.67
2010-09	127.58
2010-10	125.19
2010-11	160.27
2010-12	100.99
2011-01	295.72
2011-02	161.82
2011-03	437.42
2011-04	116.16
2011-05	177.37
2011-06	251.18
2011-07	84.62
2011-08	105.3
2011-09	119.28
2011-10	228.21
2011-11	125.09
2011-12	104.36
2012-01	161.99
2012-02	152.8
2012-03	122.81
2012-04	89.09
2012-05	224.09
2012-06	66.38
2012-07	209.71
2012-08	47.62
2012-09	73.97
2012-10	109.47
2012-11	58.18
2012-12	50.79
2013-01	83.87
2013-02	83.87
2013-03	78.81
2013-04	62.88
2013-05	91.91
2013-06	92.21
2013-07	126.73
2013-08	132.04
2013-09	120.96
2013-10
2013-11
2013-12	323.84
2014-01	166.01
2014-02	117.02
2014-03	124.89
2014-04	142.94
2014-05	135.8
2014-06	106.75
2014-07	88.78
2014-08	123.6
2014-09	125.62
2014-10	166.01
2014-11	78.98
2014-12	119.98
2015-01	195.84
2015-02	145.73
2015-03	132.33
2015-04	124.7
2015-05	129.41
2015-06	175.73
2015-07	150.24
2015-08	164.13
2015-09	158.83
2015-10	122.76
2015-11	75.46
2015-12	62.15
2016-01	74.35
2016-02	79.67
2016-03	70.68
2016-04	59.57
2016-05	57.29
2016-06	76.56
2016-07	139.87
2016-08	91.12
2016-09	62.06
2016-10	104.8
2016-11	88.75
2016-12	112.84

## Sheet: AMPARO
Major River Basin	Amparo River Basin
River	Amparo River
Location	Brgy. Mabini, Macrohon, So. Leyte
Year-Month	Runoff_mm
1985-01	35.4
1985-02	123.58
1985-03	104.57
1985-04	64.27
1985-05	51.32
1985-06	42.45
1985-07	90.38
1985-08	58.74
1985-09	135.03
1985-10	156.72
1985-11	98.85
1985-12	128.02
1986-01	281.77
1986-02	333.26
1986-03	187.78
1986-04	3.91
1986-05
1986-06	0.89
1986-07	96.97
1986-08	94.83
1986-09	126.8
1986-10	454.39
1986-11	368.03
1986-12	296.83
1987-01
1987-02
1987-03
1987-04	37.62
1987-05	31.2
1987-06	32.15
1987-07	72.14
1987-08	89.04
1987-09	67.78
1987-10	59.36
1987-11	175.17
1987-12	65.62
1988-01	42.49
1988-02	43.2
1988-03	25.01
1988-04	32.36
1988-05	6
1988-06
1988-07	16.43
1988-08
1988-09
1988-10
1988-11
1988-12	185.42
1989-01	330.75
1989-02	284.13
1989-03	231.68
1989-04	200.53
1989-05	189.48
1989-06	194.08
1989-07	207.5
1989-08	149.85
1989-09	140.84
1989-10	200.74
1989-11
1989-12
1990-01	307.11
1990-02	52.63
1990-03	31.78
1990-04	30.4
1990-05	30.95
1990-06	38.46
1990-07	41.08
1990-08	35.36
1990-09	38.74
1990-10	118.07
1990-11	453.28
1990-12	30.44
1991-01
1991-02
1991-03
1991-04
1991-05
1991-06
1991-07
1991-08
1991-09
1991-10
1991-11
1991-12
1992-01
1992-02
1992-03
1992-04	22.45
1992-05	21.75
1992-06	20.84
1992-07	19.47
1992-08	18.89
1992-09	19.58
1992-10	23.16
1992-11	95.45
1992-12	111.05
1993-01	36.05
1993-02	288.31
1993-03	134.46
1993-04	65.12
1993-05	30.37
1993-06	19.3
1993-07	48.94
1993-08	89.98
1993-09	65.99
1993-10	75.86
1993-11	121.26
1993-12	440.99
1994-01	242.97
1994-02	158.49
1994-03	137.36
1994-04	199.79
1994-05	69.64
1994-06	113.14
1994-07	198.09
1994-08	138.01
1994-09	206.87
1994-10	138.91
1994-11	140.25
1994-12	222.34
1995-01	121.14
1995-02	72.45
1995-03	141.41
1995-04	53.52
1995-05	39.45
1995-06	30.3
1995-07	43.69
1995-08	75.94
1995-09	135.59
1995-10	270.55
1995-11	235.52
1995-12	199.11
1996-01	454.42
1996-02	431.64
1996-03	234.14
1996-04	172.86
1996-05	110.07
1996-06	163.4
1996-07	101.13
1996-08	72.46
1996-09	70.23
1996-10	119.59
1996-11	284.38
1996-12	384.31
1997-01
1997-02
1997-03
1997-04
1997-05
1997-06
1997-07
1997-08
1997-09
1997-10
1997-11
1997-12
1998-01
1998-02
1998-03
1998-04
1998-05
1998-06
1998-07
1998-08
1998-09
1998-10	89.76
1998-11	108.62
1998-12	133.92
1999-01	139.89
1999-02	99.45
1999-03	67.43
1999-04	47.95
1999-05	40.18
1999-06	39.23
1999-07	38.8
1999-08	43.98
1999-09	37.3
1999-10	33.26
1999-11	55.34
1999-12	117.13
2000-01	128.13
2000-02	158.5
2000-03	150.17
2000-04	84.52
2000-05	68.01
2000-06	58.39
2000-07	68.48
2000-08	103.3
2000-09	93.7
2000-10	92.91
2000-11	93.21
2000-12	111.41
2001-01	197.88
2001-02	91.86
2001-03	128.96
2001-04	78.85
2001-05	131.02
2001-06	124
2001-07	192.19
2001-08	157.34
2001-09	76.22
2001-10	82.52
2001-11	138.81
2001-12	492.9
2002-01	284.2
2002-02	361.05
2002-03	173.84
2002-04	55.52
2002-05	38.73
2002-06	73.59
2002-07	79.01
2002-08	93.02
2002-09	133.94
2002-10	63.67
2002-11	43.29
2002-12	67.14
2003-01	131.31
2003-02	102.49
2003-03	48.94
2003-04	30.54
2003-05	26.71
2003-06	29.07
2003-07	114.19
2003-08	91.25
2003-09	142.28
2003-10	144.49
2003-11	68.3
2003-12	368.1
2004-01	166.02
2004-02	110.96
2004-03	107.14
2004-04	54.68
2004-05	81.84
2004-06	64.69
2004-07	56.43
2004-08	48.43
2004-09	36.43
2004-10	46.73
2004-11	34.05
2004-12	40.76
2005-01	50.17
2005-02	30.99
2005-03	55.31
2005-04	27.39
2005-05	25.34
2005-06	23.5
2005-07	34.02
2005-08	54.83
2005-09	92.44
2005-10	56.46
2005-11	49.88
2005-12	187.42
2006-01	134.21
2006-02	455.43
2006-03	88.24
2006-04	40.28
2006-05	41.66
2006-06	37.55
2006-07	65.95
2006-08	93.96
2006-09	353.53
2006-10	149.3
2006-11	65.5
2006-12	140.76
2007-01	408.82
2007-02	68.39
2007-03	51.11
2007-04	42.45
2007-05	45.61
2007-06	37.23
2007-07	47.96
2007-08	40.18
2007-09	32.93
2007-10	33.84
2007-11	55.76
2007-12	55.2

## Sheet: HIRAAN
Major River Basin	Hiraan River Basin
River	Hiraan River
Location	Upper Hiraan, Rarigara, Leyte
Year-Month	Runoff_mm
1986-01
1986-02
1986-03
1986-04
1986-05
1986-06
1986-07
1986-08
1986-09
1986-10
1986-11	362.85
1986-12	337.72
1987-01	579.47
1987-02	327.26
1987-03	298.43
1987-04	103.04
1987-05	92.98
1987-06	85.34
1987-07	101.08
1987-08	328.43
1987-09	93.75
1987-10	141.57
1987-11	512.89
1987-12	562.37
1988-01	320.63
1988-02	313.13
1988-03	205.15
1988-04	147.16
1988-05	86.98
1988-06	205.5
1988-07	201.85
1988-08	123.57
1988-09	152.97
1988-10	869.81
1988-11	853.07
1988-12	283.44
1989-01	539.88
1989-02	451.6
1989-03	294.83
1989-04	177.35
1989-05	250.74
1989-06	190.7
1989-07	179.36
1989-08	88.78
1989-09	73.73
1989-10	263.34
1989-11	376.17
1989-12	349.12
1990-01	471.49
1990-02	236.77
1990-03	154.17
1990-04	137.29
1990-05	215.95
1990-06	228.37
1990-07	166.16
1990-08	94.18
1990-09	96.37
1990-10	159.86
1990-11	314.64
1990-12	362.32
1991-01	351.52
1991-02	267.93
1991-03	343.72
1991-04	217.98
1991-05	191.36
1991-06	153.55
1991-07	246.84
1991-08	175.16
1991-09	83.88
1991-10	98.68
1991-11	311.45
1991-12	361.42
1992-01	351.52
1992-02	267.93
1992-03	343.72
1992-04	217.98
1992-05	191.36
1992-06	153.55
1992-07	246.84
1992-08	175.16
1992-09	83.88
1992-10	98.68
1992-11	311.45
1992-12	361.42
1993-01	163.16
1993-02	357.33
1993-03	325.73
1993-04	166.32
1993-05	111.58
1993-06	71.69
1993-07	200.06
1993-08	116.07
1993-09	141.94
1993-10	134.97
1993-11	250.78
1993-12	578.57
1994-01	418.41
1994-02	209.14
1994-03	131.97
1994-04	254.27
1994-05	197.96
1994-06	204.34
1994-07	174.26
1994-08	117.57
1994-09	192.15
1994-10	143.07
1994-11	153.55
1994-12	448.1
1995-01	353.92
1995-02	101.86
1995-03	137.07
1995-04	110.88
1995-05	115.17
1995-06	198.83
1995-07	195.56
1995-08	161.36
1995-09	169.8
1995-10	421.71
1995-11	320.44
1995-12	381.21
1996-01	399.21
1996-02	461.56
1996-03	623.86
1996-04	276.62
1996-05	228.55
1996-06	246.14
1996-07	291.83
1996-08	163.76
1996-09	167.19
1996-10	161.96
1996-11	206.66
1996-12	461.6
1997-01	206.95
1997-02	107.28
1997-03	239.05
1997-04	88.24
1997-05	71.98
1997-06	71.98
1997-07	70.78
1997-08	68.98
1997-09	78.37
1997-10	68.38
1997-11	67.34
1997-12	158.96
1998-01	65.09
1998-02	46.05
1998-03	28.49
1998-04	36.28
1998-05	28.19
1998-06	54.57
1998-07	93.28
1998-08	164.06
1998-09	47.6
1998-10	203.65
1998-11	147.74
1998-12	399.81
1999-01	238.15
1999-02	552.92
1999-03	437
1999-04	460.06
1999-05	350.32
1999-06	182.86
1999-07	82.78
1999-08	95.08
1999-09	96.95
1999-10	137.97
1999-11	425.81
1999-12	196.16
2000-01	207.25
2000-02	617.67
2000-03	368.92
2000-04	211.6
2000-05	104.68
2000-06	129.45
2000-07	191.66
2000-08	241.45
2000-09	242.07
2000-10	649.05
2000-11	267.04
2000-12	556.68
2001-01	241.15
2001-02	474.09
2001-03	342.82
2001-04	203.47
2001-05	251.04
2001-06	249.33
2001-07	201.85
2001-08	169.16
2001-09	176.77
2001-10	322.73
2001-11	581.1
2001-12	1157.74
2002-01	399.51
2002-02	373.04
2002-03	277.44
2002-04	269.65
2002-05	258.24
2002-06	418.26
2002-07	218.65
2002-08	285.24
2002-09	225.53
2002-10	184.76
2002-11	239.75
2002-12	226.15
2003-01	289.44
2003-02	317.77
2003-03	204.55
2003-04	101.88
2003-05	99.58
2003-06	169.8
2003-07	209.65
2003-08	167.96
2003-09	140.77
2003-10	166.76
2003-11	175.32
2003-12	590.87
2004-01	595.97
2004-02	179.57
2004-03	206.05
2004-04	87.08
2004-05	104.68
2004-06	109.14
2004-07	119.97
2004-08	126.27
2004-09	62.7
2004-10	158.66
2004-11	44.41
2004-12	191.96
2005-01	105.58
2005-02	51.74
2005-03	136.77
2005-04	161.96
2005-05	107.38
2005-06	78.37
2005-07	74.08
2005-08	78.88
2005-09	126.55
2005-10	188.96
2005-11	190.12
2005-12	393.21
2006-01	197.66
2006-02	356.24
2006-03	192.86
2006-04	102.46
2006-05	248.94
2006-06	413.91
2006-07	135.27
2006-08	175.16
2006-09	385.17
2006-10	196.46
2006-11	201.15
2006-12	426.8
2007-01	485.59
2007-02	138.43
2007-03	97.18
2007-04	85.05
2007-05	82.18
2007-06	89.69
2007-07	162.86
2007-08	131.67
2007-09	56.6
2007-10	279.54
2007-11	680.36
2007-12	583.67
2008-01	811.32
2008-02	837.26
2008-03	1051.86
2008-04	280.97
2008-05	147.27
2008-06	626.96
2008-07	252.84
2008-08	269.64
2008-09	305.93
2008-10	212.35
2008-11	793.56
2008-12	1576.15
2009-01	1088.76
2009-02	1217.19
2009-03	399.21
2009-04	276.62
2009-05	149.37
2009-06	1645.76
2009-07	1239.32
2009-08	963.98
2009-09	814.75
2009-10	673.35
2009-11	648.15
2009-12	621.76
2010-01	898
2010-02	429.12
2010-03	374.32
2010-04	441.19
2010-05	266.64
2010-06	298.09
2010-07	324.83
2010-08	843.41
2010-09	2234.69
2010-10	163.16
2010-11	162.83
2010-12	123.27
2011-01
2011-02
2011-03
2011-04
2011-05
2011-06
2011-07
2011-08
2011-09
2011-10
2011-11
2011-12
2012-01
2012-02
2012-03
2012-04
2012-05
2012-06
2012-07
2012-08
2012-09
2012-10
2012-11
2012-12

## Sheet: LEYTE
Major River Basin	Leyter River Basin
River	Leyter River
Location	San Joaquin, Capoocan, Leyte
Year-Month	Runoff_mm
1985-01
1985-02
1985-03
1985-04	28.86
1985-05	109.8
1985-06	99.59
1985-07	186.34
1985-08	117.24
1985-09	204.34
1985-10	266.46
1985-11	163.52
1985-12	248.27
1986-01	1018.07
1986-02	296.2
1986-03	314.15
1986-04	251.2
1986-05	111.09
1986-06	110.7
1986-07	120.73
1986-08	243.95
1986-09	159.7
1986-10	353.84
1986-11	309.17
1986-12	212.8
1987-01	404.1
1987-02	209.3
1987-03	185.88
1987-04	98.52
1987-05	84.44
1987-06	73.8
1987-07	107.32
1987-08	322.23
1987-09	104.21
1987-10	90.87
1987-11	360.75
1987-12	326.46
1988-01	131.85
1988-02	85.01
1988-03	83.98
1988-04	78.6
1988-05	66.52
1988-06	126.8
1988-07	161.07
1988-08	70.47
1988-09	77.45
1988-10
1988-11
1988-12
1989-01
1989-02
1989-03	143.87
1989-04	229.86
1989-05	345.39
1989-06	255.11
1989-07	273.63
1989-08	242.66
1989-09	161.57
1989-10	176.51
1989-11	199.98
1989-12	168.51
1990-01	371.76
1990-02	127.97
1990-03	91.7
1990-04	95.86
1990-05	146.46
1990-06	234.66
1990-07	143.34
1990-08	95.19
1990-09	95.94
1990-10	150.32
1990-11	395.96
1990-12	260.95
1991-01	228.05
1991-02	273.12
1991-03	352.74
1991-04	196.33
1991-05	139.3
1991-06	99.59
1991-07	168.61
1991-08	121.93
1991-09	99.59
1991-10	82.7
1991-11	139.78
1991-12	387.66
1992-01	134.61
1992-02	75.9
1992-03	66.43
1992-04	53.17
1992-05	45.21
1992-06	33.97
1992-07	53.57
1992-08	19.2
1992-09	19.38
1992-10	230.99
1992-11	134.98
1992-12	101.44
1993-01	139.39
1993-02	292.38
1993-03	216.94
1993-04	98.17
1993-05	48.79
1993-06	33.61
1993-07	81.68
1993-08	112.47
1993-09	76.29
1993-10	73.14
1993-11	166.81
1993-12	408.24
1994-01	197.55
1994-02	169.88
1994-03	170.35
1994-04	181.75
1994-05	131.58
1994-06	170.9
1994-07	176.05
1994-08	162.73
1994-09	188.33
1994-10	123.95
1994-11	121.73
1994-12	371.21
1995-01	65.79
1995-02	72.53
1995-03	117.61
1995-04	91.85
1995-05	86.37
1995-06	80.83
1995-07	130.38
1995-08	134.15
1995-09	178.28
1995-10	266.37
1995-11	173.93
1995-12	183.86
1996-01	170.72
1996-02	183.58
1996-03	276.66
1996-04	129.56
1996-05	88.39
1996-06	88.39
1996-07	61.84
1996-08	47.96
1996-09	74.34
1996-10	70.11
1996-11	84.65
1996-12	186.43
1997-01	96.2
1997-02	151.04
1997-03	118.99
1997-04	49.88
1997-05	41.26
1997-06	51.04
1997-07	78.19
1997-08	37.21
1997-09	33.97
1997-10	37.03
1997-11	26.85
1997-12	20.4
1998-01	49.89
1998-02	46.81
1998-03	28.39
1998-04	35.75
1998-05	16.54
1998-06	32.01
1998-07	49.89
1998-08	80.67
1998-09	105.01
1998-10	1141.74
1998-11	109.37
1998-12	312.22
1999-01	65.79
1999-02	88.39
1999-03	122.48
1999-04	58.86
1999-05	72.96
1999-06	124.58
1999-07	87.29
1999-08	67.53
1999-09	152.23
1999-10	266.37
1999-11	173.93
1999-12	183.86
2000-01	185.14
2000-02	420.02
2000-03	246.89
2000-04	313.8
2000-05	144.99
2000-06	145.29
2000-07	201.59
2000-08	138.28
2000-09	205.4
2000-10	337.4
2000-11	254.4
2000-12	135.44
2001-01	644.65
2001-02	598.62
2001-03	52.1
2001-04	47.32
2001-05	149.77
2001-06	598.78
2001-07	339.97
2001-08	228.24
2001-09	154.54
2001-10	184.5
2001-11	195.36
2001-12	280.7
2002-01	111.09
2002-02	179.93
2002-03	282.27
2002-04	164.15
2002-05	141.68
2002-06	71.76
2002-07	288.33
2002-08	260.95
2002-09	140.85
2002-10	169.25
2002-11	161.48
2002-12	264.53
2003-01	323.43
2003-02	237.85
2003-03	126.25
2003-04	67.22
2003-05	76.72
2003-06	168.68
2003-07	305.97
2003-08	100.8
2003-09	226.39
2003-10	173.75
2003-11	299.48
2003-12	782.11
2004-01	593.11
2004-02	253.14
2004-03	132.22
2004-04	63.49
2004-05	65.7
2004-06	139.25
2004-07	157.76
2004-08	84.99
2004-09	73.63
2004-10	252.95
2004-11	87.85
2004-12	333.44
2005-01	123.68
2005-02	107.06
2005-03	133.78
2005-04	66.6
2005-05	70.29
2005-06	106.88
2005-07	190.2
2005-08	110.54
2005-09	152.67
2005-10	59.54
2005-11	75.49
2005-12	524.19
2006-01	93.63
2006-02	501.68
2006-03	116.32
2006-04	72.2
2006-05	176.6
2006-06	230.03
2006-07	155.56
2006-08	157.76
2006-09	484.61
2006-10	157.58
2006-11	125.73
2006-12	277.58
2007-01	790.47
2007-02	183.41
2007-03	142.69
2007-04	109.19
2007-05	137.55
2007-06	143.69
2007-07	180.83
2007-08	182.2
2007-09	195.98
2007-10	214.55
2007-11	547.57
2007-12	562.33

## Sheet: SURIGAO
Major River Basin	Surigao River Basin
River	Surigao River
Location	Surigao City
Year-Month	Runoff_mm
1986-01
1986-02
1986-03
1986-04
1986-05	118.32
1986-06	88.74
1986-07	92.42
1986-08	93.21
1986-09	100.94
1986-10	149.14
1986-11	327.23
1986-12	317.15
1987-01	270.83
1987-02	465.85
1987-03	379.86
1987-04	118.93
1987-05	79.85
1987-06	105.14
1987-07	125.82
1987-08	65.54
1987-09	50.62
1987-10	59.74
1987-11	61.9
1987-12	161.59
1988-01
1988-02
1988-03
1988-04
1988-05
1988-06
1988-07
1988-08
1988-09
1988-10
1988-11
1988-12
1989-01
1989-02
1989-03
1989-04
1989-05
1989-06	108.33
1989-07	126.77
1989-08	63.75
1989-09	106.06
1989-10	189.5
1989-11	376.79
1989-12	162.82
1990-01	392.31
1990-02	245.96
1990-03	283.44
1990-04	234.62
1990-05	295.6
1990-06	240.14
1990-07	199.75
1990-08	150.75
1990-09	39.09
1990-10	261.07
1990-11	847
1990-12	338.52
1991-01	683.15
1991-02	164.25
1991-03	291.38
1991-04	200.93
1991-05	105.21
1991-06	145.24
1991-07	149.83
1991-08	88.01
1991-09	108.68
1991-10	120.87
1991-11	130.39
1991-12	245.66
1992-01	289.52
1992-02	103.41
1992-03	72.1
1992-04	42.39
1992-05	35.67
1992-06	29.43
1992-07	30.72
1992-08	36.36
1992-09	20.19
1992-10	52.84
1992-11	249.01
1992-12	209.42
1993-01	194.23
1993-02	938.73
1993-03	267.37
1993-04	489.4
1993-05	105.43
1993-06	57.33
1993-07	52.02
1993-08	305.65
1993-09	72.7
1993-10	103.13
1993-11	150.61
1993-12	821.51
1994-01	460.28
1994-02	955.01
1994-03	232.77
1994-04	841.76
1994-05	217.45
1994-06	241.94
1994-07	219.47
1994-08	83.98
1994-09	284.21
1994-10	118.98
1994-11	680.93
1994-12	766.56
1995-01	530.17
1995-02	670.23
1995-03	824.7
1995-04	140.58
1995-05	88.26
1995-06	105.45
1995-07	101.18
1995-08	382
1995-09	185.71
1995-10	433.4
1995-11	215.01
1995-12
1996-01
1996-02
1996-03
1996-04
1996-05
1996-06
1996-07
1996-08
1996-09
1996-10
1996-11
1996-12
1997-01	425.77
1997-02	972.66
1997-03	117.19
1997-04	86.42
1997-05	431.35
1997-06	65.53
1997-07	114.01
1997-08	46.29
1997-09	83.4
1997-10	71.59
1997-11	133.96
1997-12	372.77
1998-01	347.25
1998-02	80.43
1998-03	131.68
1998-04	60.29
1998-05	50.73
1998-06	48.06
1998-07	44.11
1998-08	53.73
1998-09	50.59
1998-10	193.16
1998-11	278.96
1998-12	589.53
1999-01	1230.33
1999-02	1347.32
1999-03	1083.46
1999-04	433.53
1999-05	102.44
1999-06	78.37
1999-07	61.86
1999-08	259.24
1999-09	187.87
1999-10	88.99
1999-11	176.68
1999-12	1076.94
2000-01	1149.54
2000-02	668.55
2000-03	442.44
2000-04	146.68
2000-05	138.96
2000-06	106.61
2000-07	306.19
2000-08	63.87
2000-09	51.35
2000-10	534.61
2000-11	1560.54
2000-12	961.99
2001-01	393.47
2001-02	441.23
2001-03	448.24
2001-04	143.38
2001-05	522.6
2001-06	240.2
2001-07	252.87
2001-08	202.55
2001-09	64.04
2001-10	82.09
2001-11	1418.83
2001-12	1566.45
2002-01	1461.02
2002-02	747.73
2002-03	251.08
2002-04	295.64
2002-05	291.82
2002-06	135.7
2002-07	90.53
2002-08	758.74
2002-09	265.45
2002-10	168.52
2002-11	399.84
2002-12	480.06
2003-01	1586.34
2003-02	652.19
2003-03	345.55
2003-04	134.66
2003-05	115.01
2003-06	90.66
2003-07	203.62
2003-08	332.18
2003-09	158.05
2003-10	278.49
2003-11	234.5
2003-12	2477.74
2004-01	1322.53
2004-02	501.33
2004-03	320.27
2004-04	127.01
2004-05	243.86
2004-06	141.77
2004-07	278.68
2004-08	76.19
2004-09	56.87
2004-10	108.43
2004-11	125.48
2004-12	287.72
2005-01	226.66
2005-02	95.65
2005-03	287.19
2005-04	65.45
2005-05	22.84
2005-06	17.8
2005-07	25.14
2005-08	36.38
2005-09	130.4
2005-10	84.66
2005-11	123.07
2005-12
2006-01
2006-02
2006-03
2006-04
2006-05
2006-06
2006-07
2006-08
2006-09
2006-10
2006-11
2006-12
2007-01
2007-02
2007-03
2007-04
2007-05
2007-06	125.48
2007-07	127.46
2007-08	95.98
2007-09	148.75
2007-10	214.62
2007-11	963.86
2007-12	1030.52
2008-01	1182.28
2008-02	1049.08
2008-03	1259.89
2008-04	266.7
2008-05	187.17
2008-06	325.46
2008-07	59.24
2008-08	118.7
2008-09	148.99
2008-10	116.62
2008-11	463.91
2008-12	666.07
2009-01	1459.19
2009-02	1940.08
2009-03	460.56
2009-04	236.27
2009-05	190.58
2009-06	123.38
2009-07	77.89
2009-08	54.89
2009-09	55.32
2009-10	46.01
2009-11	571.37
2009-12	507.07
2010-01	1540.55
2010-02	213.54
2010-03	158.18
2010-04	213.03
2010-05	104.62
2010-06	54.52
2010-07	46.64
2010-08	79.56
2010-09	49.07
2010-10	69.99
2010-11	158.66
2010-12	458.48

## Sheet: BAIS
Major River Basin	Bais River Basin
River	Bais River
Location	Cabanlutan, Bais City, Negros Oriental
Year-Month	Runoff_mm
1989-01	39.72
1989-02	44.31
1989-03	23.58
1989-04	19.98
1989-05	15.81
1989-06	91.54
1989-07	81.01
1989-08	62.26
1989-09	59.17
1989-10	57.88
1989-11	43.68
1989-12	32.99
1990-01	24.82
1990-02	17.7
1990-03	14.44
1990-04	14.1
1990-05	92.89
1990-06	105.64
1990-07	99.95
1990-08	105.18
1990-09
1990-10
1990-11
1990-12
1991-01	3.11
1991-02
1991-03
1991-04
1991-05
1991-06	39.3
1991-07	64.87
1991-08	45.4
1991-09	82.56
1991-10	104.85
1991-11	47.14
1991-12
1992-01
1992-02
1992-03
1992-04
1992-05
1992-06
1992-07
1992-08
1992-09
1992-10
1992-11
1992-12
1993-01
1993-02
1993-03
1993-04
1993-05
1993-06
1993-07
1993-08
1993-09
1993-10
1993-11
1993-12
1994-01
1994-02
1994-03
1994-04
1994-05
1994-06
1994-07
1994-08
1994-09	317.55
1994-10	445.07
1994-11	103.3
1994-12	84.27
1995-01
1995-02
1995-03
1995-04
1995-05
1995-06
1995-07
1995-08
1995-09
1995-10
1995-11
1995-12
1996-01
1996-02
1996-03
1996-04
1996-05
1996-06
1996-07
1996-08
1996-09
1996-10
1996-11
1996-12
1997-01	12.41
1997-02	15.64
1997-03	31.03
1997-04	3.22
1997-05	123.6
1997-06	25.86
1997-07	141.69
1997-08	114.32
1997-09	55.38
1997-10	65.39
1997-11	33
1997-12	2.42
1998-01	1.63
1998-02	0.26
1998-03
1998-04
1998-05
1998-06
1998-07
1998-08
1998-09
1998-10
1998-11
1998-12
1999-01
1999-02
1999-03
1999-04
1999-05
1999-06
1999-07
1999-08
1999-09
1999-10
1999-11
1999-12
2000-01	2.22
2000-02	2.08
2000-03	2.42
2000-04	1.9
2000-05	2.29
2000-06	2.4
2000-07	2.48
2000-08	2.35
2000-09	2.28
2000-10	2.42
2000-11	1.9
2000-12	3.27
2001-01	2.35
2001-02	1.77
2001-03	2.34
2001-04	1.9
2001-05	3.14
2001-06	2.72
2001-07	3.66
2001-08	25.54
2001-09	3.03
2001-10	4.44
2001-11	26.24
2001-12	22.02
2002-01	2.16
2002-02	1.26
2002-03
2002-04
2002-05
2002-06	0.86
2002-07	4.12
2002-08	20.51
2002-09	6.01
2002-10	7.58
2002-11	2.66
2002-12	2.61
2003-01	1.96
2003-02	1.65
2003-03	1.5
2003-04	1.33
2003-05	1.37
2003-06	1.9
2003-07	5.03
2003-08	3.14
2003-09	3.79
2003-10	29.27
2003-11	1.96
2003-12	1.89
2004-01	1.63
2004-02	1.06
2004-03	0.15
2004-04
2004-05	0.23
2004-06	31.93
2004-07	6.21
2004-08	25.02
2004-09	2.15
2004-10	6.47
2004-11	1.9
2004-12	1.83
2005-01	1.5
2005-02	0.97
2005-03
2005-04
2005-05	0.44
2005-06	0.11
2005-07	2.95
2005-08	8.56
2005-09	2.78
2005-10	3.01
2005-11	2.91
2005-12	4.9
2006-01	2.22
2006-02	2.01
2006-03	2.55
2006-04	0.66
2006-05	0.51
2006-06	3.16
2006-07	2.48
2006-08	6.79
2006-09	16.69
2006-10	54.22
2006-11	3.03
2006-12	3.4
2007-01	4.25
2007-02	2.24
2007-03	1.57
2007-04	1.39
2007-05	3.27
2007-06	3.03
2007-07	3.79
2007-08	2.29
2007-09	8.22
2007-10	3.53
2007-11	16.06
2007-12	3.79
2008-01	4.05
2008-02	2.57
2008-03	3.01
2008-04	2.21
2008-05	33.06
2008-06	5.31
2008-07	3.2
2008-08	2.68
2008-09	5.69
2008-10	9.93
2008-11	8.28
2008-12	4.44
2009-01	7.51
2009-02	111.17
2009-03	2.29
2009-04	2.66
2009-05	2.94
2009-06	4.24
2009-07	7.97
2009-08	6.79
2009-09	7.97
2009-10	18.55
2009-11	11.57
2009-12	2.55
2010-01	11.24
2010-02	11.98
2010-03	6.73
2010-04	6.26
2010-05	5.23
2010-06	8.22
2010-07	58.01
2010-08	62.13
2010-09	78.14
2010-10	93.48
2010-11	90.59
2010-12	72.84
2011-01	86.69
2011-02	108.98
2011-03	78.07
2011-04	55.82
2011-05	86.1
2011-06	148.29
2011-07	98.45
2011-08	145.35
2011-09	234.86
2011-10	172.79
2011-11	215.14
2011-12	247.39
2012-01	152.47
2012-02	131.51
2012-03	146.66
2012-04	94.01
2012-05	79.44
2012-06	88.25
2012-07	153.84
2012-08	92.11
2012-09	160.7
2012-10	200.95
2012-11	89.2
2012-12	168.02
2013-01	153.65
2013-02	67.86
2013-03	120.33
2013-04	100.27
2013-05	86.82
2013-06	93.75
2013-07	142.8
2013-08	175.08
2013-09	127.45
2013-10
2013-11
2013-12
2014-01	87.15
2014-02	88.51
2014-03	74.73
2014-04	223.42
2014-05	64.15
2014-06	98.5
2014-07	223.16
2014-08	75.32
2014-09	84.21
2014-10	96.36
2014-11	145.09
2014-12	120.14
2015-01	58.92
2015-02	42.9
2015-03	42.79
2015-04	55.95
2015-05	39.85
2015-06	126.63
2015-07	173.31
2015-08	182.26
2015-09	86.67
2015-10	73.88
2015-11	40.59
2015-12	78.65

## Sheet: LINGAYON
Major River Basin	Lingayon River Basin
River	Lingayon River
Location	Lingayon, Alang-Alang, Leyte
Year-Month	Runoff_mm
1957-01	422.59
1957-02	274.71
1957-03	132.58
1957-04	96.34
1957-05	88.09
1957-06	82.22
1957-07	117.7
1957-08	99.7
1957-09	46.08
1957-10	87.94
1957-11	163.44
1957-12	101.48
1958-01
1958-02
1958-03
1958-04
1958-05
1958-06
1958-07
1958-08
1958-09
1958-10
1958-11
1958-12
1959-01	165.91
1959-02	110.34
1959-03	229.6
1959-04	161.42
1959-05	186.45
1959-06	98.93
1959-07	157.43
1959-08	127.67
1959-09	123.7
1959-10	119.49
1959-11	160.42
1959-12	240.31
1960-01	176.03
1960-02	242.63
1960-03	150.44
1960-04	167.9
1960-05	100.29
1960-06	102.67
1960-07	83.18
1960-08	103.56
1960-09	105.84
1960-10	180.64
1960-11	218.74
1960-12	206.83
1961-01	166.8
1961-02	240.84
1961-03	81.39
1961-04	53.14
1961-05	159.66
1961-06	96.05
1961-07	98.21
1961-08	100.74
1961-09	61.49
1961-10	89.28
1961-11	157.97
1961-12	179.01
1962-01	222.16
1962-02	286.81
1962-03	269.03
1962-04	135.22
1962-05	230.19
1962-06	118.94
1962-07	146.72
1962-08	162.64
1962-09	161.14
1962-10	119.04
1962-11	198.72
1962-12	173.35
1963-01	312.78
1963-02	304.82
1963-03	159.96
1963-04	120.96
1963-05	129.6
1963-06	123.41
1963-07	119.19
1963-08	251.32
1963-09	129.46
1963-10	103.86
1963-11	285.12
1963-12	182.13
1964-01	156.98
1964-02	582.13
1964-03	511.43
1964-04	162.86
1964-05	166.51
1964-06	148.75
1964-07	276.32
1964-08	129.31
1964-09	124.42
1964-10	132.43
1964-11	383.18
1964-12	196.27
1965-01	379.44
1965-02	182.52
1965-03	297.9
1965-04	198
1965-05	140.02
1965-06	111.89
1965-07	107.43
1965-08	94.49
1965-09	103.1
1965-10	127.82
1965-11	180
1965-12	557.85
1966-01	136.3
1966-02	125.8
1966-03	114.28
1966-04	104.69
1966-05	252.22
1966-06	121.1
1966-07	302.36
1966-08	151.33
1966-09	111.02
1966-10	131.39
1966-11	149.9
1966-12	590.74
1967-01	2651.91
1967-02	737.32
1967-03	535.53
1967-04	93.31
1967-05	72.17
1967-06	30.67
1967-07	40.32
1967-08	42.26
1967-09	31.39
1967-10	118.3
1967-11	676.51
1967-12	405.33
1968-01	245.52
1968-02	253.76
1968-03	120.68
1968-04	93.02
1968-05	60.12
1968-06	100.66
1968-07	69.79
1968-08	68.3
1968-09	112.46
1968-10	96.72
1968-11	610.99
1968-12	276.77
1969-01	134.96
1969-02	91.8
1969-03	82.58
1969-04	75.17
1969-05	114.43
1969-06	76.32
1969-07	167.85
1969-08	136.75
1969-09	94.32
1969-10	106.84
1969-11	307.73
1969-12	538.66
1970-01	251.77
1970-02	302.53
1970-03	147.01
1970-04	99.22
1970-05	84.22
1970-06	84.82
1970-07	106.39
1970-08	97.02
1970-09	144
1970-10	283.17
1970-11	356.83
1970-12	349.38
1971-01
1971-02
1971-03	511.43
1971-04	329.47
1971-05	231.38
1971-06	354.53
1971-07	493.87
1971-08	118.3
1971-09	106.99
1971-10	218.14
1971-11	235.01
1971-12	148.8
1972-01	1071.5
1972-02	107.32
1972-03	274.54
1972-04	123.7
1972-05	125.59
1972-06	178.13
1972-07	100.59
1972-08	320.81
1972-09	112.32
1972-10	140.76
1972-11	162.86
1972-12	486.91
1973-01	83.33
1973-02	61.42
1973-03	81.99
1973-04	70.13
1973-05	70.23
1973-06	75.89
1973-07	102.52
1973-08	97.02
1973-09	89.42
1973-10	124.99
1973-11	141.84
1973-12	460.98
1974-01	157.43
1974-02	102.55
1974-03	141.36
1974-04	103.97
1974-05	90.77
1974-06	97.92
1974-07	96.87
1974-08	72.47
1974-09	69.98
1974-10	113.98
1974-11	202.03
1974-12	167.25
1975-01	143.44
1975-02	101.74
1975-03	120.68
1975-04	276.91
1975-05	131.24
1975-06	137.38
1975-07	155.5
1975-08	181.24
1975-09	137.23
1975-10	216.65
1975-11	169.63
1975-12	367.39
1976-01	671.68
1976-02	216.18
1976-03	213.83
1976-04	121.25
1976-05	72.61
1976-06	77.62
1976-07
1976-08
1976-09
1976-10	124.99
1976-11	149.33
1976-12
1977-01
1977-02
1977-03
1977-04
1977-05
1977-06
1977-07
1977-08
1977-09
1977-10
1977-11
1977-12
1978-01	134.07
1978-02	116.79
1978-03	188.23
1978-04	347.33
1978-05	126.18
1978-06	135.3
1978-07	97.46
1978-08	101.78
1978-09
1978-10	127.22
1978-11	142.99
1978-12	474.34
1979-01	142.55
1979-02	112.36
1979-03	95.08
1979-04
1979-05
1979-06
1979-07
1979-08
1979-09
1979-10
1979-11
1979-12
1980-01	80.47
1980-02	276.87
1980-03	164.13
1980-04	135.65
1980-05	88.24
1980-06	123.51
1980-07	154.45
1980-08	194.48
1980-09	125.14
1980-10	155.2
1980-11
1980-12
1981-01
1981-02
1981-03
1981-04
1981-05
1981-06
1981-07
1981-08
1981-09
1981-10
1981-11
1981-12
1982-01
1982-02
1982-03
1982-04
1982-05
1982-06
1982-07
1982-08
1982-09
1982-10
1982-11
1982-12
1983-01
1983-02
1983-03
1983-04
1983-05
1983-06
1983-07
1983-08
1983-09
1983-10
1983-11
1983-12
1984-01
1984-02
1984-03
1984-04
1984-05
1984-06
1984-07
1984-08
1984-09
1984-10
1984-11
1984-12
1985-01
1985-02
1985-03
1985-04
1985-05
1985-06
1985-07
1985-08
1985-09
1985-10	59.61
1985-11	153.36
1985-12	154.6
1986-01	884.76
1986-02	190.18
1986-03	252.36
1986-04
1986-05
1986-06
1986-07	100.44
1986-08	107.73
1986-09	86.54
1986-10	498.18
1986-11	362.16
1986-12	217.4
1987-01	163.68
1987-02	114.37
1987-03
1987-04	79.2
1987-05	54.46
1987-06	67.39
1987-07
1987-08
1987-09
1987-10
1987-11	206.06
1987-12	141.66
1988-01	84.37
1988-02	88.25
1988-03	78.27
1988-04	87.55
1988-05	88.39
1988-06	111.46
1988-07	92.55
1988-08	78.86
1988-09	92.3
1988-10
1988-11
1988-12	857.09
1989-01	620.5
1989-02	429.14
1989-03	373.19
1989-04	160.99
1989-05	460.54
1989-06	159.7
1989-07	157.43
1989-08	140.76
1989-09
1989-10
1989-11
1989-12
1990-01	295.37
1990-02	78.22
1990-03	70.68
1990-04	59.47
1990-05	204.6
1990-06	141.55
1990-07	96.72
1990-08	69.79
1990-09	59.18
1990-10	117.55
1990-11	330.62
1990-12	155.94
1991-01	333.76
1991-02	270.01
1991-03	1203.79
1991-04	112.46
1991-05	103.12
1991-06	125.28
1991-07	192.4
1991-08	126.18
1991-09	62.78
1991-10	66.22
1991-11	136.8
1991-12	607.7

## Sheet: SAPINITON
Major River Basin	Sapiniton River Basin
River	Sapiniton River
Location	Libton, San Miguel, Leyte
Year-Month	Runoff_mm
1984-01
1984-02
1984-03
1984-04
1984-05
1984-06
1984-07
1984-08
1984-09
1984-10
1984-11	1.71
1984-12	276.65
1985-01	523.27
1985-02	180.24
1985-03	56.02
1985-04	48.95
1985-05	102.97
1985-06	47.79
1985-07	123.99
1985-08	19.16
1985-09	55.07
1985-10	164.87
1985-11	92.07
1985-12	115.16
1986-01
1986-02
1986-03
1986-04
1986-05
1986-06
1986-07
1986-08
1986-09
1986-10
1986-11
1986-12
1987-01	143.87
1987-02	96.88
1987-03	3.7
1987-04	26.56
1987-05	14.38
1987-06	17.68
1987-07	31.88
1987-08	231.47
1987-09	38.18
1987-10	40.35
1987-11	393.46
1987-12	201.25
1988-01	60.86
1988-02	35.56
1988-03	36.65
1988-04	43.05
1988-05	31.14
1988-06	46.47
1988-07	44.6
1988-08	35.66
1988-09	40.73
1988-10
1988-11
1988-12
1989-01
1989-02
1989-03
1989-04
1989-05	63.55
1989-06
1989-07
1989-08
1989-09
1989-10	82.08
1989-11	39.32
1989-12
1990-01	246.51
1990-02	24.2
1990-03	27.12
1990-04	22.8
1990-05	117.96
1990-06	98.7
1990-07	30.14
1990-08	34.32
1990-09	16.75
1990-10	156.51
1990-11	303.16
1990-12	112.23
1991-01	150.23
1991-02	250.26
1991-03	369.63
1991-04	53.05
1991-05	49.12
1991-06	62.24
1991-07	123.46
1991-08	45.07
1991-09	23.74
1991-10	55.59
1991-11	234.78
1991-12	216.46
1992-01	208.81
1992-02	48.9
1992-03	25.29
1992-04	21.46
1992-05	15.93
1992-06	15.97
1992-07	35.19
1992-08	26.59
1992-09	16.77
1992-10	49.19
1992-11	82.06
1992-12	76.25
1993-01	57.66
1993-02	246.28
1993-03	118.81
1993-04	38.92
1993-05	20.1
1993-06	14.11
1993-07	24.12
1993-08	34.99
1993-09	32.88
1993-10	51.65
1993-11	209.51
1993-12	654.27
1994-01	75.55
1994-02	119.24
1994-03	90.16
1994-04	43.43
1994-05	52.69
1994-06	52.14
1994-07	64.52
1994-08	31.25
1994-09	74.06
1994-10	65.6
1994-11	79.83
1994-12	459.09
1995-01	159.69
1995-02	40.25
1995-03	88.08
1995-04	36.32
1995-05	38.31
1995-06	53.06
1995-07	51.59
1995-08	135.43
1995-09	180.26
1995-10	326.59
1995-11	174.77
1995-12	338.56
1996-01	318.69
1996-02	279.32
1996-03	462.53
1996-04	223.23
1996-05	82.78
1996-06	77.24
1996-07	70.96
1996-08	62.13
1996-09	52.78
1996-10	61.66
1996-11	193.64
1996-12	461.05
1997-01	179.23
1997-02	146.22
1997-03	172.82
1997-04	48.88
1997-05	53.67
1997-06	49.93
1997-07	109.79
1997-08	33.13
1997-09	66.09
1997-10	115.35
1997-11	75.11
1997-12	79.94
1998-01	37.96
1998-02	24.93
1998-03	21.33
1998-04	20.05
1998-05	26.9
1998-06	18.4
1998-07	18.46
1998-08	14.11
1998-09	14.78
1998-10	243.98
1998-11	183.56
1998-12	366.35
1999-01	121.25
1999-02	367.09
1999-03	155.43
1999-04	70.43
1999-05	31.02
1999-06	10.99
1999-07	13.74
1999-08	8.86
1999-09	18.34
1999-10	26.74
1999-11	319.15
1999-12	348.79
2000-01	88.49
2000-02	486.92
2000-03	283.2
2000-04	136.31
2000-05	49.04
2000-06	44.45
2000-07	75.77
2000-08	31.81
2000-09	29.08
2000-10	110.23
2000-11	114.14
2000-12	385.61
2001-01	528.92
2001-02	318.42
2001-03	157.84
2001-04	10
2001-05	18.25
2001-06	25.31
2001-07	106.89
2001-08	60.71
2001-09	46.37
2001-10	155.96
2001-11	327.01
2001-12	319.51
2002-01	252.52
2002-02	86.21
2002-03	102.27
2002-04	91.81
2002-05	60.79
2002-06	59.29
2002-07	105.26
2002-08	102.3
2002-09	106.07
2002-10	82.06
2002-11	80.41
2002-12	122.25
2003-01	165.36
2003-02	90.63
2003-03	62.06
2003-04	24.81
2003-05	48.19
2003-06	143.53
2003-07	204.59
2003-08	155.03
2003-09	63.73
2003-10	124.62
2003-11	208.48
2003-12	276.4
2004-01	429.73
2004-02	201.51
2004-03	171.48
2004-04	67.85
2004-05	134.61
2004-06	106.65
2004-07	88.95
2004-08	49.25
2004-09	63.15
2004-10	113.48
2004-11	125.83
2004-12	126.88
2005-01	126.22
2005-02	51.03
2005-03	75.9
2005-04	91.39
2005-05	55
2005-06	37.39
2005-07	83.77
2005-08	41.42
2005-09	100.31
2005-10	98.78
2005-11	112.11
2005-12	681.86
2006-01	175.41
2006-02	469.75
2006-03	136.94
2006-04	50.93
2006-05	279.79
2006-06	62.86
2006-07	105.72
2006-08	49.61
2006-09	208.57
2006-10	136.44
2006-11	48.6
2006-12	327.05
2007-01	507.69
2007-02	69.53
2007-03	49.65
2007-04	37.09
2007-05	60.6
2007-06	35.87
2007-07	52.16
2007-08	51.4
2007-09	65.85
2007-10	67.11
2007-11	364.15
2007-12	240.43
2008-01	452.6
2008-02	699.24
2008-03	315.1
2008-04	169.64
2008-05	129.32
2008-06	289.2
2008-07	109.48
2008-08	192.12
2008-09	87.21
2008-10	142.57
2008-11	264.97
2008-12	311.28
2009-01	35.27
2009-02	391.81
2009-03	139.62
2009-04	98.6
2009-05	225.1
2009-06	193.65
2009-07	187.06
2009-08	88.56
2009-09	121.54
2009-10	65.95
2009-11	138.82
2009-12	203.41
2010-01	376.36
2010-02	54.6
2010-03	42.78
2010-04	59.92
2010-05	31.29
2010-06	17.75
2010-07	60.47
2010-08	94.57
2010-09	102.72
2010-10	154.81
2010-11	190.22
2010-12	253.49

## Sheet: LAOAG
Major River Basin	Laoag River Basin
River	Laoag River
Location	Poblacion, Laoag City, Ilocos Norte
Year-Month	Runoff_mm
1984-01	29.71
1984-02	13.93
1984-03	11.08
1984-04	184.59
1984-05	260.42
1984-06	315.07
1984-07
1984-08	399.2
1984-09	83.74
1984-10	64.83
1984-11	38.42
1984-12
1985-01	19.25
1985-02	12.37
1985-03	10.13
1985-04	7.68
1985-05	33.35
1985-06
1985-07	371.1
1985-08
1985-09	382.59
1985-10	320.63
1985-11	107.24
1985-12
1986-01	20.5
1986-02	9.36
1986-03	9.62
1986-04	12.51
1986-05	35.81
1986-06	66.22
1986-07	1043.52
1986-08	1429.33
1986-09	1687.54
1986-10	190.3
1986-11	210.03
1986-12	59.78
1987-01	22.01
1987-02	16.55
1987-03	15.29
1987-04	8.89
1987-05	9.52
1987-06	119.96
1987-07	199.39
1987-08	174.9
1987-09	1028.08
1987-10	209.56
1987-11	149.08
1987-12
1988-01	53.56
1988-02	21.63
1988-03	16.88
1988-04	11.12
1988-05	34.22
1988-06	279
1988-07	654.94
1988-08	511.13
1988-09	188.74
1988-10	233.91
1988-11	4889
1988-12	26.3
1989-01	28.69
1989-02	15.65
1989-03	11.09
1989-04	9.88
1989-05	12.2
1989-06	75.15
1989-07	519.91
1989-08	707.64
1989-09
1989-10
1989-11
1989-12
1990-01	1394.07
1990-02	657.1
1990-03	1251.49
1990-04	1748.86
1990-05	97.96
1990-06	42.19
1990-07	33.58
1990-08
1990-09
1990-10
1990-11
1990-12
1991-01	16.43
1991-02	10.37
1991-03	7.41
1991-04	32.29
1991-05	45.83
1991-06	1405.48
1991-07	1261.22
1991-08	1175.17
1991-09	1018.67
1991-10	308.25
1991-11	44.8
1991-12
1992-01	41.14
1992-02	30.57
1992-03	23.04
1992-04	17.34
1992-05	63.3
1992-06	135.16
1992-07
1992-08
1992-09
1992-10
1992-11
1992-12
1993-01	29.31
1993-02	16.58
1993-03	18.06
1993-04	15.75
1993-05	26.75
1993-06	107.51
1993-07	214.22
1993-08	565.46
1993-09	561.44
1993-10	222.32
1993-11	40.14
1993-12	35.73
1994-01	20.52
1994-02	13.25
1994-03	10.38
1994-04	8.68
1994-05	24.71
1994-06	105.44
1994-07	879.97
1994-08	645.9
1994-09	600.64
1994-10	60.91
1994-11	20.69
1994-12	15.01
1995-01
1995-02
1995-03
1995-04
1995-05
1995-06
1995-07
1995-08
1995-09
1995-10
1995-11
1995-12
1996-01
1996-02
1996-03
1996-04
1996-05
1996-06
1996-07
1996-08
1996-09
1996-10
1996-11
1996-12
1997-01
1997-02
1997-03
1997-04
1997-05
1997-06
1997-07
1997-08
1997-09
1997-10
1997-11
1997-12
1998-01
1998-02
1998-03
1998-04
1998-05
1998-06
1998-07
1998-08
1998-09
1998-10
1998-11
1998-12
1999-01
1999-02
1999-03
1999-04
1999-05
1999-06
1999-07
1999-08
1999-09
1999-10
1999-11
1999-12
2000-01
2000-02
2000-03
2000-04
2000-05
2000-06
2000-07
2000-08
2000-09
2000-10
2000-11
2000-12
2001-01	3.75
2001-02	2.96
2001-03	24.54
2001-04	14.52
2001-05	57.93
2001-06	232.68
2001-07	1206.96
2001-08	481.78
2001-09	1218.88
2001-10	211.54
2001-11	89.1
2001-12
2002-01	50.96
2002-02	31.39
2002-03	28.07
2002-04	23.48
2002-05	57.87
2002-06	155.03
2002-07	424.82
2002-08	361.58
2002-09	189.54
2002-10	152.78
2002-11	61.58
2002-12	40.94
2003-01	37.01
2003-02	36.26
2003-03	43.57
2003-04	39.92
2003-05	113.11
2003-06	1042.09
2003-07	243.84
2003-08	345.06
2003-09	562.64
2003-10	129.92
2003-11	175.79
2003-12	86.54
2004-01	60.6
2004-02	39.93
2004-03	35.86
2004-04	30.48
2004-05	36.89
2004-06	1478.74
2004-07	1024.36
2004-08	689.62
2004-09	211.72
2004-10	44.86
2004-11	21.72
2004-12	84.76
2005-01	26.61
2005-02	22.72
2005-03	22.11
2005-04	19.23
2005-05	18.12
2005-06	142.63
2005-07	111.66
2005-08	251.03
2005-09	637.32
2005-10	82.68
2005-11	54.68
2005-12	47.24
2006-01	45.4
2006-02	35.49
2006-03	26.98
2006-04	11.9
2006-05	3.33
2006-06	12.9
2006-07	402.95
2006-08	207.27
2006-09	194.57
2006-10	56
2006-11	76.81
2006-12	35.05
2007-01	63.12
2007-02	57.04
2007-03	48.27
2007-04	52.39
2007-05	62.39
2007-06	136.18
2007-07	139.84
2007-08	318.57
2007-09	232.23
2007-10	157.96
2007-11	147.24
2007-12	86.91
2008-01	45.08
2008-02	18.98
2008-03	20.92
2008-04	20.85
2008-05	67.24
2008-06	75.18
2008-07	389.72
2008-08	459.82
2008-09	326.48
2008-10	150.42
2008-11	83.23
2008-12	63.63
2009-01	41.33
2009-02	48.04
2009-03	23.22
2009-04	42.05
2009-05	55.93
2009-06	138.92
2009-07	244.37
2009-08	137
2009-09	164.24
2009-10
2009-11	42.35
2009-12	18.47
2010-01	11.95
2010-02	2.17
2010-03
2010-04	1.82
2010-05	17.46
2010-06	80.99
2010-07	280.75
2010-08	259.37
2010-09	166.42
2010-10	176.4
2010-11	160.27
2010-12	49.15
2011-01	50.18
2011-02	30.57
2011-03	20.33
2011-04	8.94
2011-05	112.14
2011-06	438.74
2011-07	378.65
2011-08	943.11
2011-09	717.59
2011-10	361.06
2011-11	90.46
2011-12	104.33
2012-01	54.35
2012-02	23.61
2012-03	12.23
2012-04	15.13
2012-05	64.98
2012-06	333.63
2012-07	477.87
2012-08	751.5
2012-09	255.97
2012-10	102.99
2012-11	28.74
2012-12	14.41
2013-01	11.34
2013-02	9.98
2013-03	11.17
2013-04	10.43
2013-05	20.45
2013-06	153.47
2013-07	191.51
2013-08	561.63
2013-09	566.02
2013-10	133.36
2013-11	186.37
2013-12	63.96
2014-01	30.74
2014-02	18.58
2014-03	13.33
2014-04	10.79
2014-05	12.28
2014-06	42.39
2014-07	281.49
2014-08	256.4
2014-09	566.97
2014-10	52.07
2014-11	31.69
2014-12	26.15
2015-01	2.95
2015-02
2015-03
2015-04
2015-05	1.82
2015-06	13.8
2015-07	220.69
2015-08	841.13
2015-09	35.69
2015-10	142.84
2015-11	39.03
2015-12	75.55
2016-01	76.13
2016-02	65.59
2016-03	55.76
2016-04
2016-05
2016-06
2016-07	75.18
2016-08
2016-09	184.21
2016-10	147.16
2016-11	64.9
2016-12	45.22

[truncated: 45 more sheets: PARED, GANANO, MAGAT, CAMILING, GUMAIN, RIO CHICO, SAN JUAN, PANGALAAN, DAS-AY, TUKURAN, HIJO, CAGAYAN, DAVAO, ALLAH, AGUSAN CANYON, WAWA, BUAYAN, GASGAS, JALAUR 1, PADSAN …]
